# Supplementary material for: Bioluminescence Sensing in 3D Spherical Microtissues for Multiple Bioactivity Analysis of Environmental Samples
Source: MDPI journal article supplement (doi:10.3390/s22124568), 2022-06-17
Supplement: s1 [file s1]

## Supplementary materials

# Bioluminescence Sensing in 3D Spherical Microtissues for Multiple Bioactivity Analysis of Environmental Samples

Maria Maddalena Calabretta <sup>1,2</sup>, Denise Gregucci <sup>1,2</sup>, Tiziana Guarnieri <sup>3,4</sup>, Marina Bonini <sup>5</sup>, Elisa Neri <sup>5</sup>, Martina Zangheri <sup>1</sup> and Elisa Micheleni <sup>1,2,4,\*</sup>

<sup>1</sup> Department of Chemistry “Giacomo Ciamician”, Alma Mater Studiorum – University of Bologna,

Via Selmi 2, 40126 Bologna, Italy; maria.calabretta2@unibo.it (M.M.C.); denise.gregucci2@unibo.it (D.G.); martina.zangheri2@unibo.it (M.Z.)

<sup>2</sup> Center for Applied Biomedical Research (CRBA), Azienda Ospedaliero-Universitaria Policlinico S. Orsola-Malpighi, 40138 Bologna, Italy

<sup>3</sup> Cell Physiology Laboratory, Department of Biological, Geological and Environmental Sciences (BiGeA), Alma Mater Studiorum Università di Bologna, 40126 Bologna, Italy; tiziana.guarnieri@unibo.it

<sup>4</sup> Health Sciences and Technologies-Interdepartmental Center for Industrial Research (HST-ICIR), University of Bologna, 40126 Bologna, Italy

<sup>5</sup> ARPAE Emilia-Romagna Laboratorio Multisito, Sede di Bologna, Via F Rocchi 19, 40128 Bologna, Italy; mbonini@arpae.it (M.B.); eneri@arpae.it (E.N.)

\* Correspondence: elisa.micheleni8@unibo.it; Tel./Fax: +39-0512099533

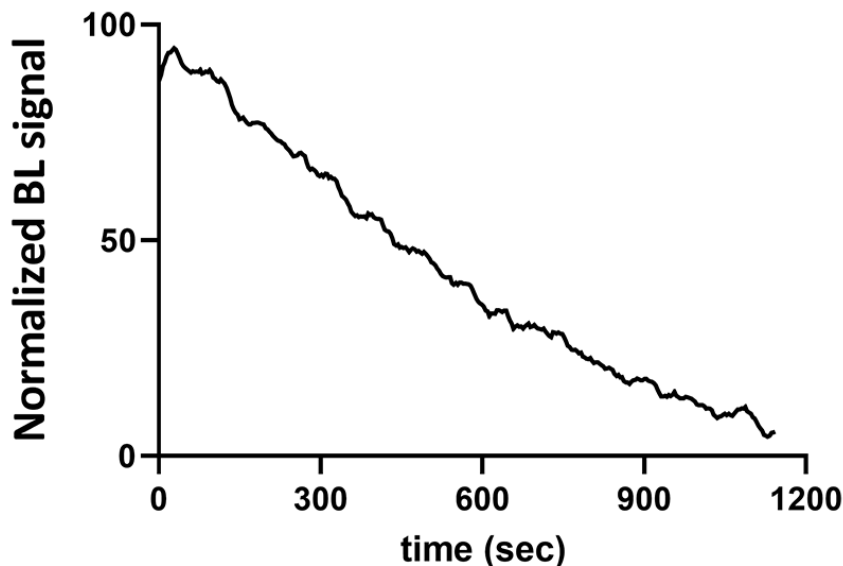

Figure S1: Emission kinetic of 3D spherical microtissue transfected with pCDNALuc2P after the addition of D-luciferin substrate (1.0 mM, pH 5.0).

a)

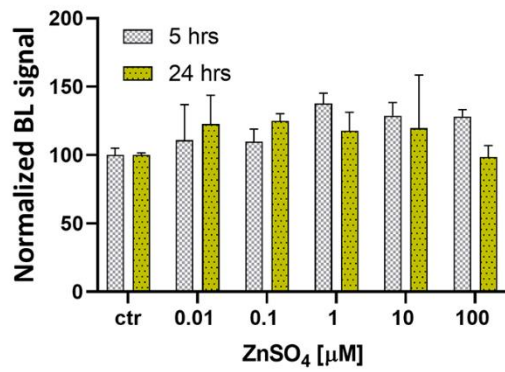

b)

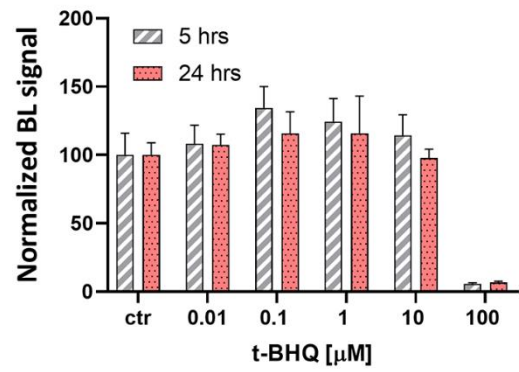

Figure S2: Toxicity dose-response curves obtained in 3D spherical microtissues transfected with pCDNALuc2P, grown in medium with charcoal stripped FBS 0.5% v/v and treated with a) ZnSO<sub>4</sub> solutions (concentration range from 0.01 to 100  $\mu$ M) and with b) t-BHQ solutions (concentration range from 0.01 to 100  $\mu$ M) (b) for 5hrs and 24 hrs.

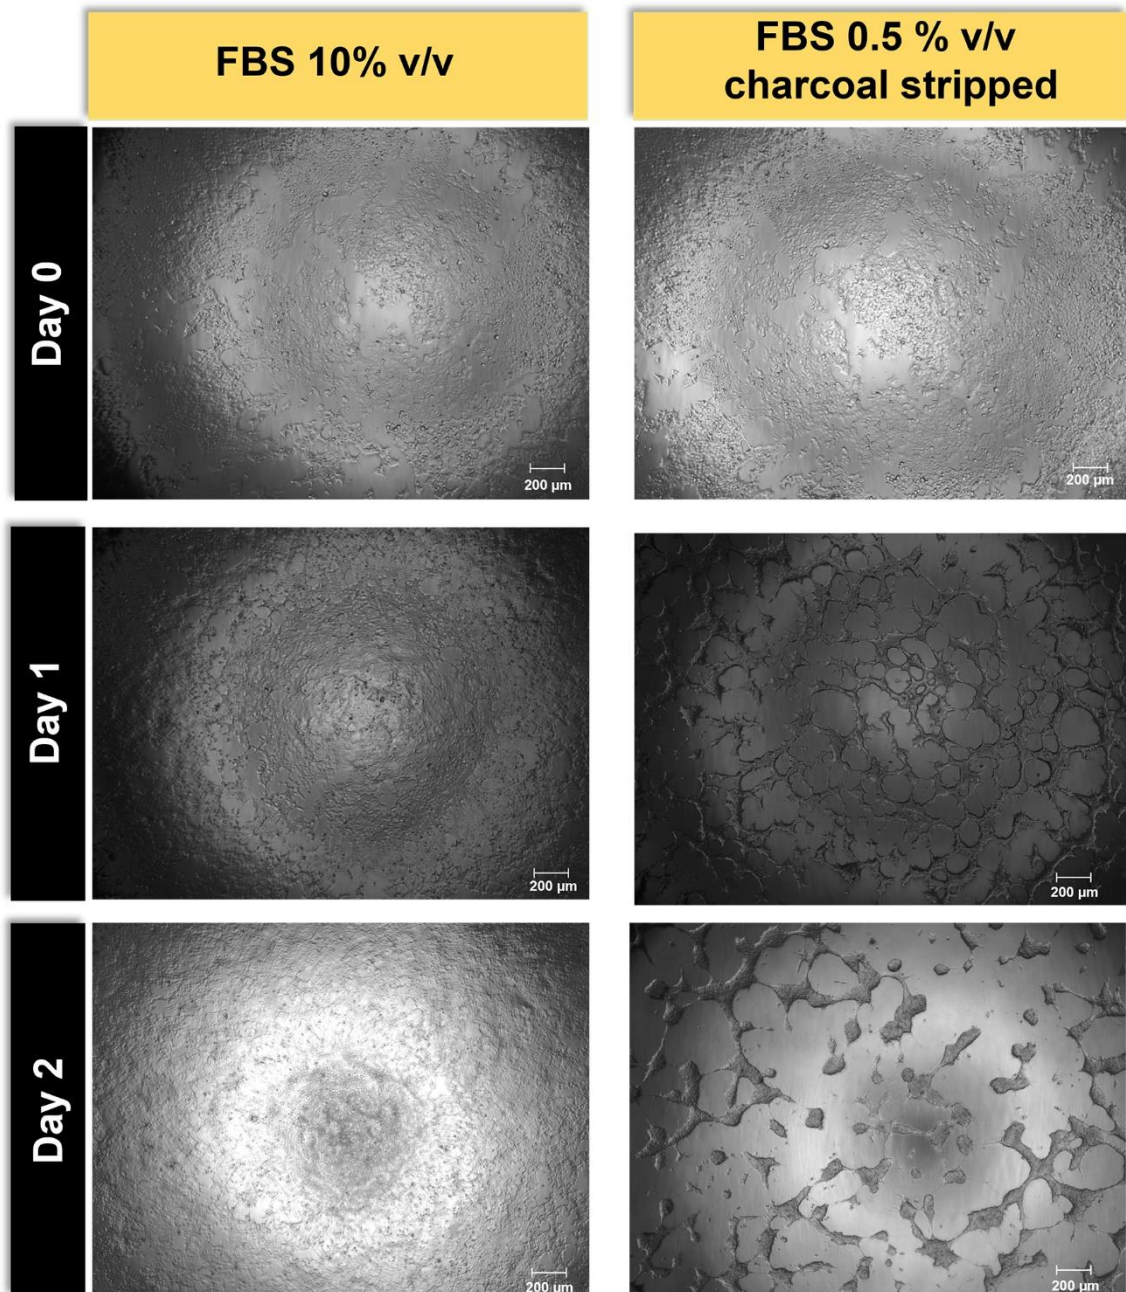

Figure S3: Growth monitoring of 2D cell cultures in 10% v/v FBS and charcoal stripped 0.5% v/v FBS. Brightfield images were acquired with Invitrogen Evos M5000 Imaging Systems Thermo Scientific using an objective 4x

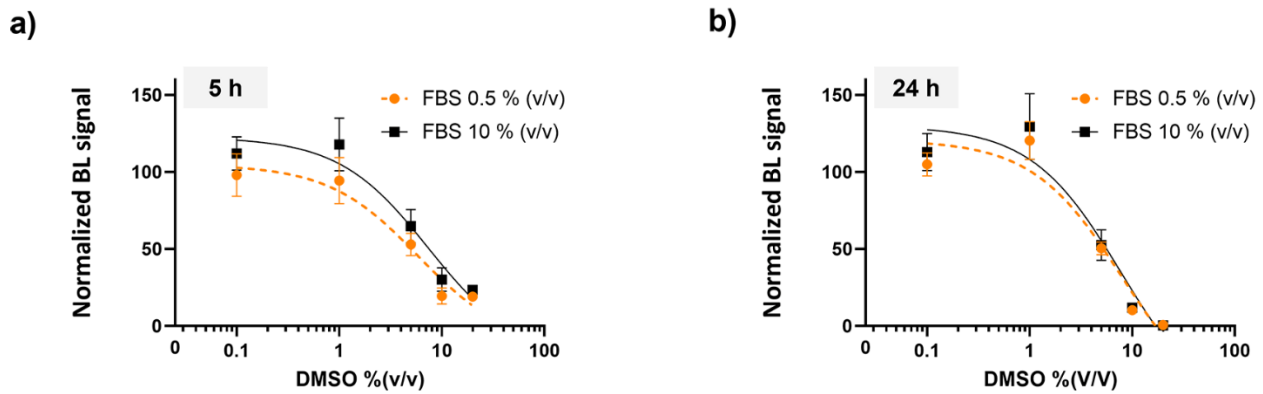

Figure S4: DMSO toxicity curves obtained at a) 5hrs and b) 24 hrs with 3D spherical microtissues cultured in FBS 0.5% (v/v) charcoal stripped and FBS 10% (v/v) medium.

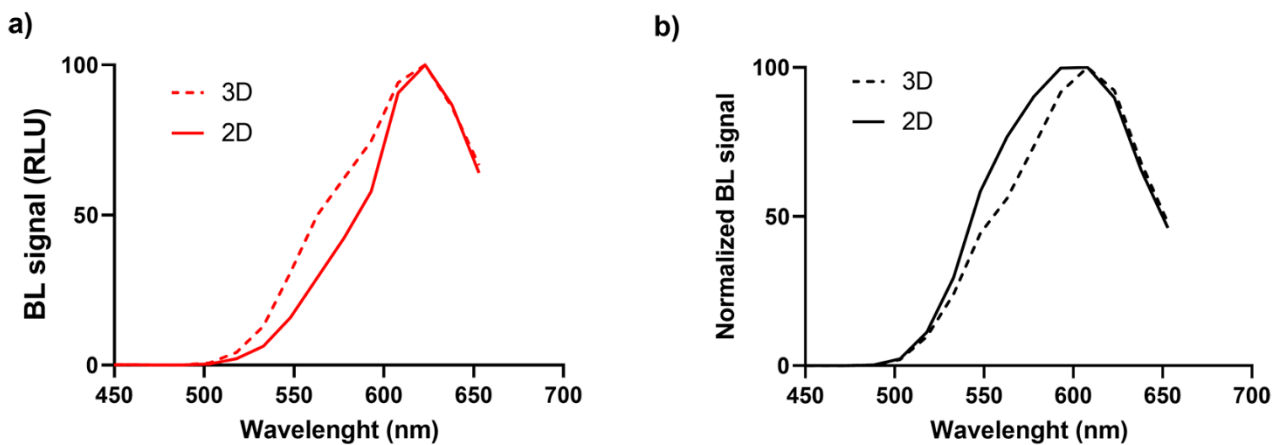

Figure S5: BL emission spectra obtained in 2D and 3D cell Hek293T models with a) D-Luciferin non-lysing substrate 1.0 mM in buffer citrate pH 5.0 and b) Bright-Glo™ commercial lysing substrate.

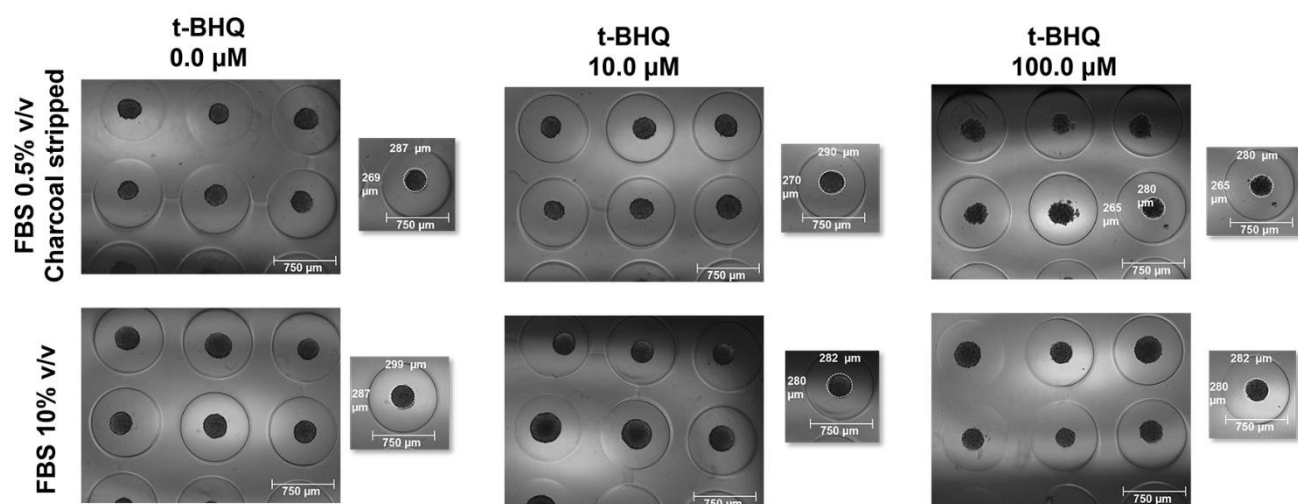

Figure S6: Brightfield images of 1 day-old HEK293T spheroids transfected with pGL4.37[luc2P/ARE/Hygro] and treated for 5 hrs with t-BHQ.

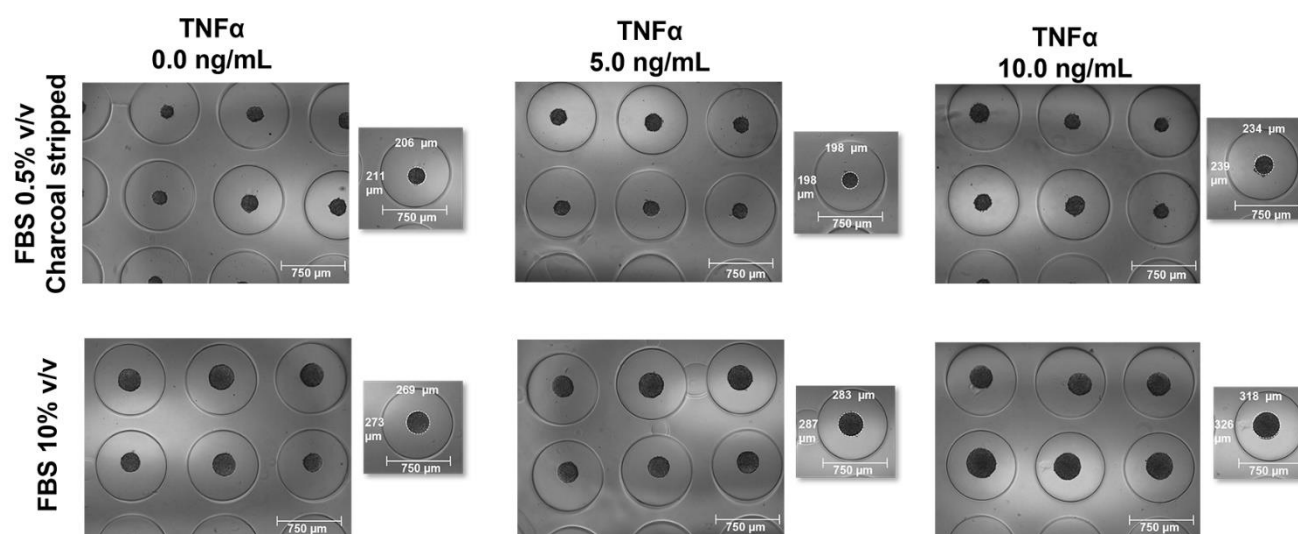

Figure S7: Brightfield images of 1 day-old HEK293T spheroids transfected with pGL4.32[luc2P/NF- $\kappa$ B-RE/Hygro] and treated for 5 hrs with TNF $\alpha$ .

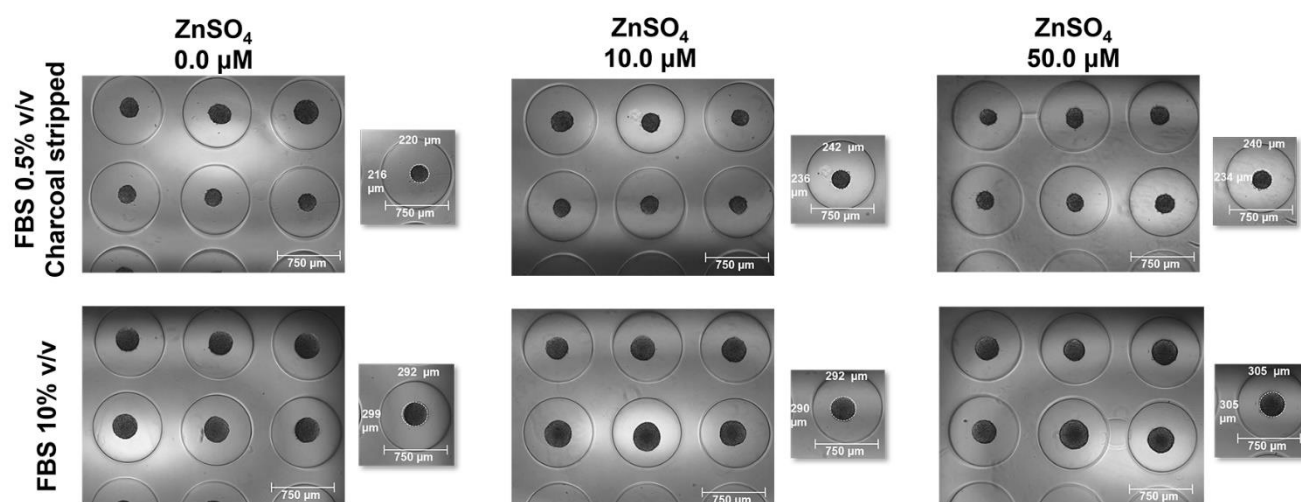

Figure S8: Brightfield images of 1 day-old HEK293T spheroids transfected with pGL4.40[luc2P/MRE/Hygro] and treated for 5 hrs with  $\text{ZnSO}_4$ .
